# Supplementary material for: Temperature-induced 1D lanthanide polymeric frameworks based on Lnn (n = 2, 2, 4, 6) cores: synthesis, crystal structures and luminescence properties
Source: Royal Society of Chemistry journal article supplement (doi:10.1039/c5dt04262c), 2015-12-23
Supplement: c5dt04262c1.pdf [file c5dt04262c1.pdf]

## Supporting Information

### Table of Contents

- Synthesis of Dy<sub>0.986</sub>Eu<sub>0.014</sub> and Dy<sub>0.973</sub>Gd<sub>0.018</sub>Eu<sub>0.09</sub> complexes.** The synthetic method of Dy<sub>0.986</sub>Eu<sub>0.014</sub> and Dy<sub>0.973</sub>Gd<sub>0.018</sub>Eu<sub>0.09</sub> complexes is same as the synthetic method of complex **1-5** just by loading the corresponding Ln(NO<sub>3</sub>)<sub>3</sub>·6H<sub>2</sub>O as the starting materials in stoichiometric ratios. For Dy<sub>0.986</sub>Eu<sub>0.014</sub> doped complex, Selected IR (KBr pellet, cm<sup>-1</sup>): 3436(vs), 1658(vs), 1635(vs), 1521(m), 1469(s), 1429(vs), 1404(vs), 1385(vs), 1270(w), 1147(w), 1120(w), 1070(m), 949(w), 929(w), 866(w), 850(m), 811(w), 773(w), 730(m), 667(w), 418(w). For Dy<sub>0.973</sub>Gd<sub>0.018</sub>Eu<sub>0.09</sub> doped complex, Selected IR (KBr pellet, cm<sup>-1</sup>): 3436(vs), 1658(vs), 1635(vs), 1521(m), 1469(m), 1430(vs), 1404(vs), 1385(vs), 1270(w), 1147(w), 1120(w), 1070(m), 949(w), 929(w), 866(w), 850(m), 812(w), 773(w), 730(m), 668(w).  
**The metal ion sensing experiment.** Complex **2** powders (5 mg) were immersed in an aqueous solution (0.01 mol/L 5 mL) of M(NO<sub>3</sub>)<sub>x</sub> (M = Mg<sup>2+</sup>, Pb<sup>2+</sup>, Ba<sup>2+</sup>, Na<sup>+</sup>, Cd<sup>2+</sup>, K<sup>+</sup>, Li<sup>+</sup>, Al<sup>3+</sup>, Ca<sup>2+</sup> and Ni<sup>2+</sup>), treated by ultrasonication for approximately 30 min, and then aged for three days.  
**The solvent sensing experiment.** Complex **2** powders (5 mg) were immersed in different organic solvents (5 mL), treated by ultrasonication for approximately 30 min, and then aged for three days.
- The PXRD patterns for complexes **2, 3, 5**, the Dy<sub>0.986</sub>Eu<sub>0.014</sub>, Dy<sub>0.973</sub> Gd<sub>0.018</sub>Eu<sub>0.09</sub> doped complexes, and PXRD patterns of **2** after immersing in Ni<sup>2+</sup> aqueous solution and nitrobenzene (Fig. S1).
- 3D supramolecular architecture of **3** (Fig. S2).
- 3D supramolecular architecture of **6** (Fig. S3).
- 3D supramolecular architecture of **8** (Fig. S4).
- 3D supramolecular architecture of **11** (Fig. S5).
- Decay profile of complexes **2** (a) and **4** (b) (Fig. S6).
- Emission spectra of complexes **2** (a) and **4** (b) exciting at f-f absorption (Fig. S7).
- The luminescent intensity (<sup>5</sup>D<sub>0</sub>→<sup>7</sup>F<sub>2</sub>) of complex **2** in nitrobenzene or Ni<sup>2+</sup> aqueous solution after five cycles (Fig. S8).
- Selected bond lengths [Å] and angles [°] for complexes **1-11** (Table S1, S2, S3).
- CIE chromaticity coordinates for Dy<sub>0.986</sub>Eu<sub>0.014</sub> doped complex (Table S4).
- CIE chromaticity coordinates for Dy<sub>0.973</sub>Gd<sub>0.018</sub>Eu<sub>0.009</sub> doped complex (Table S5).

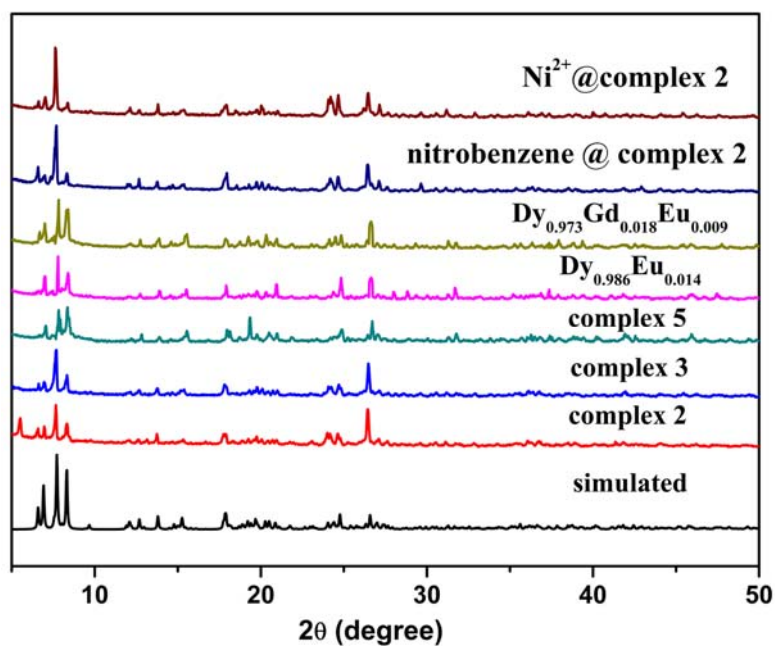

Fig. S1 The PXRD patterns for complexes **2**, **3**, **5**, the Dy<sub>0.986</sub>Eu<sub>0.014</sub> and Dy<sub>0.973</sub>Gd<sub>0.018</sub>Eu<sub>0.009</sub> doped complexes, and PXRD patterns of **2** after immersing in Ni<sup>2+</sup> aqueous solution and nitrobenzene.

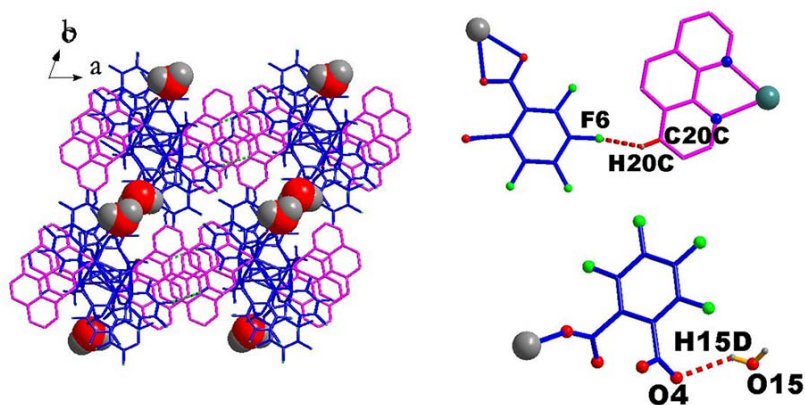

Fig.S2 3D supramolecular architecture of complex **3**  
Symmetry codes: C:  $-1+x, y, z$ ; D:  $1-x, -y, 1-z$ .

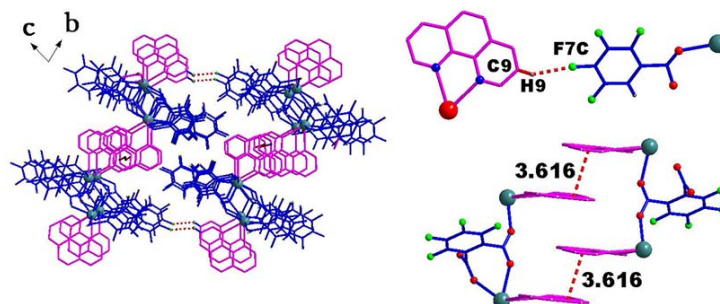

Fig. S3 3D supramolecular architecture of complex **6** by the C-H...F and  $\pi$ - $\pi$  stacking  
Symmetry codes: C:  $x, 1+y, -1+z$ .

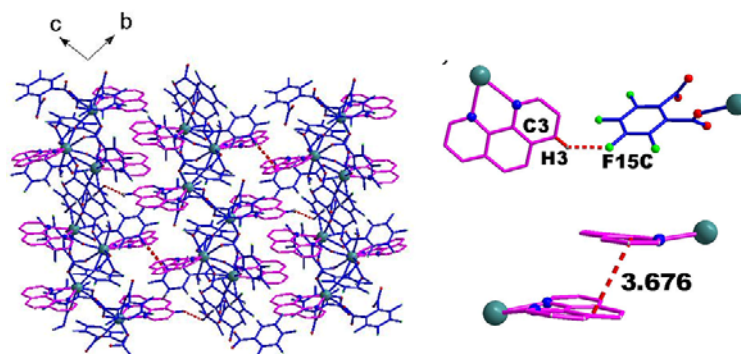

Fig. S4 3D supramolecular architecture of complex **8** by the C-H...F and  $\pi$ - $\pi$  stacking.  
Symmetry code: C: 1+x, 1+y, z.

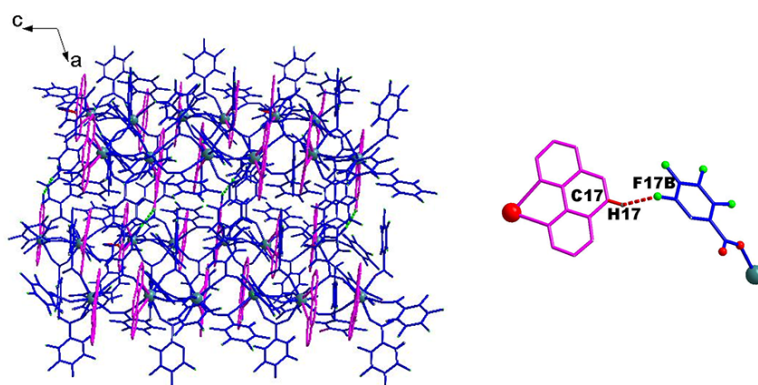

Fig. S5 3D supramolecular architecture of complex **11** by the C-H...F.  
Symmetry code: B: -x, 0.5+y, 0.5-z.

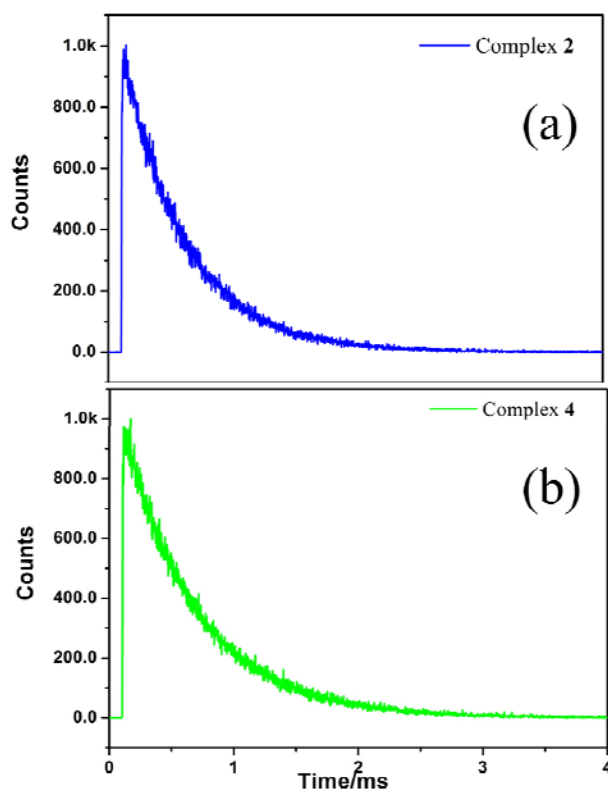

Fig. S6 Decay profile of complexes **2** (a) and **4** (b).

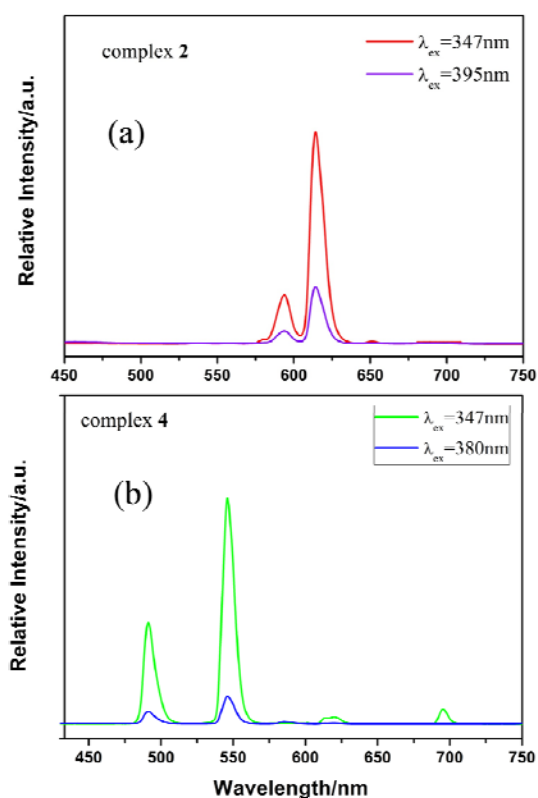

Fig. S7 Emission spectra of complexes **2** (a) and **4** (b) exciting at f-f absorption (395 nm for **2** and 380 nm for **4**).

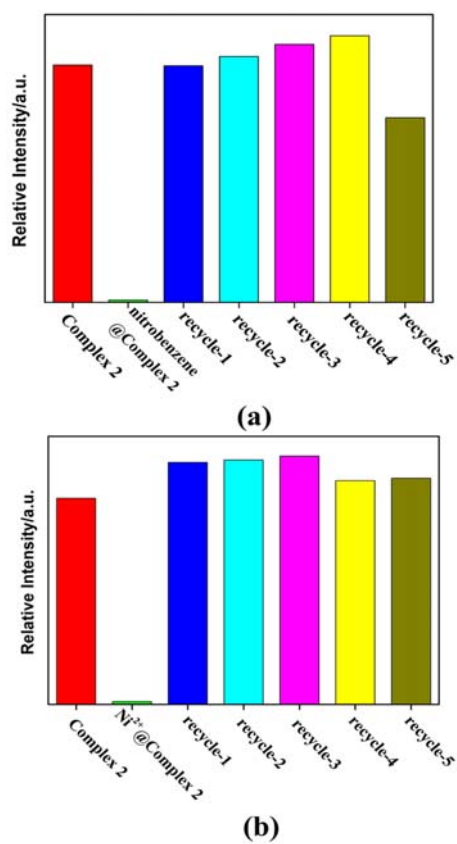

Fig. S8 The luminescence intensity ( ${}^5D_0 \rightarrow {}^7F_2$ ) of five recyclable experiments of sensing for nitrobenzene (a) and  $Ni^{2+}$  (b).

**Table S1** Selected bond lengths (Å) and angles (°) for complexes **1-5**

| <b>1</b>             |           |                       |            |
|----------------------|-----------|-----------------------|------------|
| Sm(1)-O(10)          | 2.373(2)  | Sm(1)-O(3)#1          | 2.373(2)   |
| Sm(1)-O(1)           | 2.399(2)  | Sm(1)-O(12)#1         | 2.436(2)   |
| Sm(1)-O(13)          | 2.453(2)  | Sm(1)-O(11)           | 2.599(2)   |
| Sm(1)-N(1)           | 2.614(3)  | Sm(1)-N(2)            | 2.634(3)   |
| Sm(1)-O(11)#1        | 2.714(2)  | Sm(2)-O(7)#2          | 2.281(2)   |
| Sm(2)-O(9)           | 2.320(2)  | Sm(2)-O(2)            | 2.411(2)   |
| Sm(2)-O(6)           | 2.438(2)  | Sm(2)-O(14)           | 2.447(3)   |
| Sm(2)-O(5)           | 2.495(2)  | Sm(2)-N(3)            | 2.560(3)   |
| Sm(2)-N(4)           | 2.614(3)  |                       |            |
| O(10)-Sm(1)-O(3)#1   | 87.02(8)  | O(10)-Sm(1)-O(1)      | 77.28(8)   |
| O(3)#1-Sm(1)-O(1)    | 144.65(8) | O(10)-Sm(1)-O(12)#1   | 149.77(8)  |
| O(3)#1-Sm(1)-O(12)#1 | 122.00(8) | O(1)-Sm(1)-O(12)#1    | 73.70(8)   |
| O(10)-Sm(1)-O(13)    | 133.98(8) | O(3)#1-Sm(1)-O(13)    | 72.20(8)   |
| O(1)-Sm(1)-O(13)     | 139.69(8) | O(12)#1-Sm(1)-O(13)   | 69.55(8)   |
| O(10)-Sm(1)-O(11)    | 72.06(7)  | O(3)#1-Sm(1)-O(11)    | 70.74(7)   |
| O(1)-Sm(1)-O(11)     | 74.32(8)  | O(12)#1-Sm(1)-O(11)   | 107.40(7)  |
| O(13)-Sm(1)-O(11)    | 132.43(8) | O(10)-Sm(1)-N(1)      | 92.15(8)   |
| O(3)#1-Sm(1)-N(1)    | 139.37(8) | O(1)-Sm(1)-N(1)       | 73.50(9)   |
| O(12)#1-Sm(1)-N(1)   | 71.72(8)  | O(13)-Sm(1)-N(1)      | 79.71(9)   |
| O(11)-Sm(1)-N(1)     | 146.56(8) | O(10)-Sm(1)-N(2)      | 65.77(8)   |
| O(3)#1-Sm(1)-N(2)    | 80.61(8)  | O(1)-Sm(1)-N(2)       | 119.43(8)  |
| O(12)#1-Sm(1)-N(2)   | 122.93(8) | O(13)-Sm(1)-N(2)      | 70.51(8)   |
| O(11)-Sm(1)-N(2)     | 129.63(7) | N(1)-Sm(1)-N(2)       | 62.39(8)   |
| O(10)-Sm(1)-O(11)#1  | 133.62(7) | O(3)#1-Sm(1)-O(11)#1  | 86.25(7)   |
| O(1)-Sm(1)-O(11)#1   | 82.32(8)  | O(12)#1-Sm(1)-O(11)#1 | 50.03(7)   |
| O(13)-Sm(1)-O(11)#1  | 86.55(7)  | O(11)-Sm(1)-O(11)#1   | 62.42(8)   |
| N(1)-Sm(1)-O(11)#1   | 121.18(8) | N(2)-Sm(1)-O(11)#1    | 156.13(8)  |
| O(7)#2-Sm(2)-O(9)    | 146.75(8) | O(7)#2-Sm(2)-O(2)     | 131.58(8)  |
| O(9)-Sm(2)-O(2)      | 77.11(8)  | O(7)#2-Sm(2)-O(6)     | 83.03(9)   |
| O(9)-Sm(2)-O(6)      | 80.63(9)  | O(2)-Sm(2)-O(6)       | 138.90(9)  |
| O(7)#2-Sm(2)-O(14)   | 72.03(9)  | O(9)-Sm(2)-O(14)      | 141.17(9)  |
| O(2)-Sm(2)-O(14)     | 67.11(9)  | O(6)-Sm(2)-O(14)      | 117.20(11) |
| O(7)#2-Sm(2)-O(5)    | 103.87(9) | O(9)-Sm(2)-O(5)       | 88.51(9)   |
| O(2)-Sm(2)-O(5)      | 92.95(9)  | O(6)-Sm(2)-O(5)       | 52.15(8)   |
| O(14)-Sm(2)-O(5)     | 79.06(11) | O(7)#2-Sm(2)-N(3)     | 80.27(9)   |
| O(9)-Sm(2)-N(3)      | 92.14(9)  | O(2)-Sm(2)-N(3)       | 78.58(10)  |
| O(6)-Sm(2)-N(3)      | 136.67(9) | O(14)-Sm(2)-N(3)      | 95.01(11)  |
| O(5)-Sm(2)-N(3)      | 171.12(9) | O(7)#2-Sm(2)-N(4)     | 78.70(9)   |
| O(9)-Sm(2)-N(4)      | 69.08(8)  | O(2)-Sm(2)-N(4)       | 126.71(9)  |
| O(6)-Sm(2)-N(4)      | 74.35(9)  | O(14)-Sm(2)-N(4)      | 146.30(10) |

|                      |            |                       |            |
|----------------------|------------|-----------------------|------------|
| O(5)-Sm(2)-N(4)      | 124.95(9)  | N(3)-Sm(2)-N(4)       | 63.31(9)   |
| <b>2</b>             |            |                       |            |
| Eu(1)-O(3)#1         | 2.359(3)   | Eu(1)-O(10)           | 2.359(3)   |
| Eu(1)-O(1)           | 2.387(3)   | Eu(1)-O(12)#1         | 2.424(3)   |
| Eu(1)-O(13)          | 2.444(3)   | Eu(1)-N(1)            | 2.589(3)   |
| Eu(1)-O(11)          | 2.596(3)   | Eu(1)-N(2)            | 2.625(3)   |
| Eu(1)-O(11)#1        | 2.713(3)   | Eu(2)-O(7)#2          | 2.268(3)   |
| Eu(2)-O(9)           | 2.303(3)   | Eu(2)-O(2)            | 2.397(3)   |
| Eu(2)-O(6)           | 2.424(3)   | Eu(2)-O(14)           | 2.431(3)   |
| Eu(2)-O(5)           | 2.487(3)   | Eu(2)-N(3)            | 2.550(4)   |
| Eu(2)-N(4)           | 2.606(3)   |                       |            |
| O(3)#1-Eu(1)-O(10)   | 87.24(10)  | O(3)#1-Eu(1)-O(1)     | 144.25(10) |
| O(10)-Eu(1)-O(1)     | 77.04(10)  | O(3)#1-Eu(1)-O(12)#1  | 121.84(10) |
| O(10)-Eu(1)-O(12)#1  | 149.57(10) | O(1)-Eu(1)-O(12)#1    | 73.70(10)  |
| O(3)#1-Eu(1)-O(13)   | 72.48(10)  | O(10)-Eu(1)-O(13)     | 134.12(10) |
| O(1)-Eu(1)-O(13)     | 139.73(10) | O(12)#1-Eu(1)-O(13)   | 69.65(10)  |
| O(3)#1-Eu(1)-N(1)    | 139.83(10) | O(10)-Eu(1)-N(1)      | 92.01(10)  |
| O(1)-Eu(1)-N(1)      | 73.48(11)  | O(12)#1-Eu(1)-N(1)    | 71.90(10)  |
| O(13)-Eu(1)-N(1)     | 79.74(11)  | O(3)#1-Eu(1)-O(11)    | 70.70(9)   |
| O(10)-Eu(1)-O(11)    | 72.27(9)   | O(1)-Eu(1)-O(11)      | 73.95(9)   |
| O(12)#1-Eu(1)-O(11)  | 106.85(9)  | O(13)-Eu(1)-O(11)     | 132.58(9)  |
| N(1)-Eu(1)-O(11)     | 146.26(10) | O(3)#1-Eu(1)-N(2)     | 80.73(10)  |
| O(10)-Eu(1)-N(2)     | 65.62(10)  | O(1)-Eu(1)-N(2)       | 119.53(10) |
| O(12)#1-Eu(1)-N(2)   | 123.47(10) | O(13)-Eu(1)-N(2)      | 70.65(10)  |
| N(1)-Eu(1)-N(2)      | 62.74(10)  | O(11)-Eu(1)-N(2)      | 129.65(9)  |
| O(3)#1-Eu(1)-O(11)#1 | 85.63(9)   | O(10)-Eu(1)-O(11)#1   | 133.65(9)  |
| O(1)-Eu(1)-O(11)#1   | 82.66(9)   | O(12)#1-Eu(1)-O(11)#1 | 50.02(9)   |
| O(13)-Eu(1)-O(11)#1  | 86.38(9)   | N(1)-Eu(1)-O(11)#1    | 121.39(9)  |
| O(11)-Eu(1)-O(11)#1  | 62.15(10)  | N(2)-Eu(1)-O(11)#1    | 155.92(9)  |
| O(7)#2-Eu(2)-O(9)    | 146.85(10) | O(7)#2-Eu(2)-O(2)     | 131.79(10) |
| O(9)-Eu(2)-O(2)      | 76.97(10)  | O(7)#2-Eu(2)-O(6)     | 82.79(11)  |
| O(9)-Eu(2)-O(6)      | 80.80(11)  | O(2)-Eu(2)-O(6)       | 138.75(10) |
| O(7)#2-Eu(2)-O(14)   | 71.85(11)  | O(9)-Eu(2)-O(14)      | 141.26(10) |
| O(2)-Eu(2)-O(14)     | 67.24(11)  | O(6)-Eu(2)-O(14)      | 117.11(12) |
| O(7)#2-Eu(2)-O(5)    | 104.01(11) | O(9)-Eu(2)-O(5)       | 88.19(11)  |
| O(2)-Eu(2)-O(5)      | 92.58(11)  | O(6)-Eu(2)-O(5)       | 52.18(9)   |
| O(14)-Eu(2)-O(5)     | 79.36(13)  | O(7)#2-Eu(2)-N(3)     | 80.40(11)  |
| O(9)-Eu(2)-N(3)      | 92.36(11)  | O(2)-Eu(2)-N(3)       | 78.58(12)  |
| O(6)-Eu(2)-N(3)      | 136.99(11) | O(14)-Eu(2)-N(3)      | 94.58(13)  |
| O(5)-Eu(2)-N(3)      | 170.76(10) | O(7)#2-Eu(2)-N(4)     | 78.75(10)  |
| O(9)-Eu(2)-N(4)      | 69.20(10)  | O(2)-Eu(2)-N(4)       | 126.69(11) |
| O(6)-Eu(2)-N(4)      | 74.60(10)  | O(14)-Eu(2)-N(4)      | 146.00(11) |
| O(5)-Eu(2)-N(4)      | 125.11(10) | N(3)-Eu(2)-N(4)       | 63.43(11)  |

---

**3**

---

|                      |            |                       |            |
|----------------------|------------|-----------------------|------------|
| Gd(1)-O(10)          | 2.3540(19) | Gd(1)-O(3)#1          | 2.3545(19) |
| Gd(1)-O(1)           | 2.381(2)   | Gd(1)-O(12)#1         | 2.416(2)   |
| Gd(1)-O(13)          | 2.427(2)   | Gd(1)-O(11)           | 2.580(2)   |
| Gd(1)-N(1)           | 2.584(2)   | Gd(1)-N(2)            | 2.616(2)   |
| Gd(1)-O(11)#1        | 2.730(2)   | Gd(2)-O(7)#2          | 2.2642(19) |
| Gd(2)-O(9)           | 2.298(2)   | Gd(2)-O(2)            | 2.389(2)   |
| Gd(2)-O(6)           | 2.418(2)   | Gd(2)-O(14)           | 2.420(2)   |
| Gd(2)-O(5)           | 2.480(2)   | Gd(2)-N(3)            | 2.532(2)   |
| Gd(2)-N(4)           | 2.583(2)   |                       |            |
| O(10)-Gd(1)-O(3)#1   | 87.50(7)   | O(10)-Gd(1)-O(1)      | 76.87(7)   |
| O(3)#1-Gd(1)-O(1)    | 144.14(7)  | O(10)-Gd(1)-O(12)#1   | 149.41(7)  |
| O(3)#1-Gd(1)-O(12)#1 | 121.61(7)  | O(1)-Gd(1)-O(12)#1    | 73.64(8)   |
| O(10)-Gd(1)-O(13)    | 134.43(7)  | O(3)#1-Gd(1)-O(13)    | 72.56(7)   |
| O(1)-Gd(1)-O(13)     | 139.63(7)  | O(12)#1-Gd(1)-O(13)   | 69.63(8)   |
| O(10)-Gd(1)-O(11)    | 72.39(6)   | O(3)#1-Gd(1)-O(11)    | 70.73(6)   |
| O(1)-Gd(1)-O(11)     | 73.80(7)   | O(12)#1-Gd(1)-O(11)   | 106.39(7)  |
| O(13)-Gd(1)-O(11)    | 132.53(7)  | O(10)-Gd(1)-N(1)      | 92.06(7)   |
| O(3)#1-Gd(1)-N(1)    | 140.08(7)  | O(1)-Gd(1)-N(1)       | 73.44(8)   |
| O(12)#1-Gd(1)-N(1)   | 71.98(7)   | O(13)-Gd(1)-N(1)      | 79.74(8)   |
| O(11)-Gd(1)-N(1)     | 146.16(7)  | O(10)-Gd(1)-N(2)      | 65.84(7)   |
| O(3)#1-Gd(1)-N(2)    | 80.67(7)   | O(1)-Gd(1)-N(2)       | 119.82(8)  |
| O(12)#1-Gd(1)-N(2)   | 123.75(7)  | O(13)-Gd(1)-N(2)      | 70.64(7)   |
| O(11)-Gd(1)-N(2)     | 129.80(6)  | N(1)-Gd(1)-N(2)       | 63.08(7)   |
| O(10)-Gd(1)-O(11)#1  | 133.58(6)  | O(3)#1-Gd(1)-O(11)#1  | 85.08(6)   |
| O(1)-Gd(1)-O(11)#1   | 82.97(7)   | O(12)#1-Gd(1)-O(11)#1 | 50.02(6)   |
| O(13)-Gd(1)-O(11)#1  | 86.08(7)   | O(11)-Gd(1)-O(11)#1   | 61.91(7)   |
| N(1)-Gd(1)-O(11)#1   | 121.53(7)  | N(2)-Gd(1)-O(11)#1    | 155.45(6)  |
| O(7)#2-Gd(2)-O(9)    | 146.83(7)  | O(7)#2-Gd(2)-O(2)     | 131.86(8)  |
| O(9)-Gd(2)-O(2)      | 76.91(7)   | O(7)#2-Gd(2)-O(6)     | 82.32(8)   |
| O(9)-Gd(2)-O(6)      | 81.47(8)   | O(2)-Gd(2)-O(6)       | 138.86(8)  |
| O(7)#2-Gd(2)-O(14)   | 72.09(8)   | O(9)-Gd(2)-O(14)      | 141.03(8)  |
| O(2)-Gd(2)-O(14)     | 67.01(8)   | O(6)-Gd(2)-O(14)      | 116.68(10) |
| O(7)#2-Gd(2)-O(5)    | 104.39(9)  | O(9)-Gd(2)-O(5)       | 88.23(9)   |
| O(2)-Gd(2)-O(5)      | 91.80(8)   | O(6)-Gd(2)-O(5)       | 52.67(7)   |
| O(14)-Gd(2)-O(5)     | 78.97(10)  | O(7)#2-Gd(2)-N(3)     | 80.47(8)   |
| O(9)-Gd(2)-N(3)      | 92.38(8)   | O(2)-Gd(2)-N(3)       | 78.43(8)   |
| O(6)-Gd(2)-N(3)      | 137.48(8)  | O(14)-Gd(2)-N(3)      | 94.30(10)  |
| O(5)-Gd(2)-N(3)      | 169.79(8)  | O(7)#2-Gd(2)-N(4)     | 78.68(8)   |
| O(9)-Gd(2)-N(4)      | 69.18(7)   | O(2)-Gd(2)-N(4)       | 127.09(8)  |
| O(6)-Gd(2)-N(4)      | 74.50(8)   | O(14)-Gd(2)-N(4)      | 146.31(9)  |
| O(5)-Gd(2)-N(4)      | 125.29(8)  | N(3)-Gd(2)-N(4)       | 64.15(8)   |

---

**4**

---

|                      |          |                       |          |
|----------------------|----------|-----------------------|----------|
| Tb(1)-O(3)#1         | 2.332(7) | Tb(1)-O(10)           | 2.340(6) |
| Tb(1)-O(1)           | 2.372(6) | Tb(1)-O(12)#1         | 2.388(6) |
| Tb(1)-O(13)          | 2.406(7) | Tb(1)-O(11)           | 2.570(7) |
| Tb(1)-N(1)           | 2.570(8) | Tb(1)-N(2)            | 2.592(7) |
| Tb(1)-O(11)#1        | 2.803(7) | Tb(2)-O(7)#2          | 2.243(7) |
| Tb(2)-O(9)           | 2.300(6) | Tb(2)-O(6)            | 2.394(6) |
| Tb(2)-O(2)           | 2.402(6) | Tb(2)-O(14)           | 2.410(7) |
| Tb(2)-O(5)           | 2.453(7) | Tb(2)-N(3)            | 2.513(8) |
| Tb(2)-N(4)           | 2.590(7) |                       |          |
|                      |          |                       |          |
| O(3)#1-Tb(1)-O(10)   | 87.3(2)  | O(3)#1-Tb(1)-O(1)     | 143.7(2) |
| O(10)-Tb(1)-O(1)     | 77.1(2)  | O(3)#1-Tb(1)-O(12)#1  | 120.4(2) |
| O(10)-Tb(1)-O(12)#1  | 150.2(2) | O(1)-Tb(1)-O(12)#1    | 73.8(2)  |
| O(3)#1-Tb(1)-O(13)   | 73.2(2)  | O(10)-Tb(1)-O(13)     | 134.6(2) |
| O(1)-Tb(1)-O(13)     | 139.3(2) | O(12)#1-Tb(1)-O(13)   | 69.7(2)  |
| O(3)#1-Tb(1)-O(11)   | 70.8(2)  | O(10)-Tb(1)-O(11)     | 72.7(2)  |
| O(1)-Tb(1)-O(11)     | 73.3(2)  | O(12)#1-Tb(1)-O(11)   | 104.2(2) |
| O(13)-Tb(1)-O(11)    | 132.8(2) | O(3)#1-Tb(1)-N(1)     | 140.6(2) |
| O(10)-Tb(1)-N(1)     | 93.2(2)  | O(1)-Tb(1)-N(1)       | 73.6(2)  |
| O(12)#1-Tb(1)-N(1)   | 72.8(2)  | O(13)-Tb(1)-N(1)      | 79.0(2)  |
| O(11)-Tb(1)-N(1)     | 146.2(2) | O(3)#1-Tb(1)-N(2)     | 81.0(2)  |
| O(10)-Tb(1)-N(2)     | 65.7(2)  | O(1)-Tb(1)-N(2)       | 119.9(3) |
| O(12)#1-Tb(1)-N(2)   | 125.3(2) | O(13)-Tb(1)-N(2)      | 70.8(2)  |
| O(11)-Tb(1)-N(2)     | 130.4(2) | N(1)-Tb(1)-N(2)       | 63.7(2)  |
| O(3)#1-Tb(1)-O(11)#1 | 83.4(2)  | O(10)-Tb(1)-O(11)#1   | 134.1(2) |
| O(1)-Tb(1)-O(11)#1   | 84.6(2)  | O(12)#1-Tb(1)-O(11)#1 | 48.9(2)  |
| O(13)-Tb(1)-O(11)#1  | 84.8(2)  | O(11)-Tb(1)-O(11)#1   | 61.8(2)  |
| N(1)#2-Tb(1)-O(11)#1 | 121.5(2) | N(2)-Tb(1)-O(11)#1    | 153.9(2) |
| O(7)#2-Tb(2)-O(9)    | 147.0(2) | O(7)#2-Tb(2)-O(6)     | 82.5(3)  |
| O(9)-Tb(2)-O(6)      | 82.1(2)  | O(7)#2-Tb(2)-O(2)     | 132.3(2) |
| O(9)-Tb(2)-O(2)      | 76.2(2)  | O(6)-Tb(2)-O(2)       | 138.0(2) |
| O(7)#2-Tb(2)-O(14)   | 71.3(3)  | O(9)-Tb(2)-O(14)      | 141.6(2) |
| O(6)-Tb(2)-O(14)     | 116.6(3) | O(2)-Tb(2)-O(14)      | 67.7(2)  |
| O(7)#2-Tb(2)-O(5)    | 104.4(3) | O(9)-Tb(2)-O(5)       | 88.9(3)  |
| O(6)-Tb(2)-O(5)      | 52.9(2)  | O(2)-Tb(2)-O(5)       | 90.8(2)  |
| O(14)-Tb(2)-O(5)     | 79.1(3)  | O(7)#2-Tb(2)-N(3)     | 81.1(3)  |
| O(9)-Tb(2)-N(3)      | 91.4(3)  | O(6)-Tb(2)-N(3)       | 138.3(2) |
| O(2)-Tb(2)-N(3)      | 78.3(3)  | O(14)-Tb(2)-N(3)      | 93.8(3)  |
| O(5)-Tb(2)-N(3)      | 168.7(2) | O(7)#2-Tb(2)-N(4)     | 77.7(2)  |
| O(9)-Tb(2)-N(4)      | 70.2(2)  | O(6)-Tb(2)-N(4)       | 75.1(2)  |
| O(2)-Tb(2)-N(4)      | 127.7(2) | O(14)-Tb(2)-N(4)      | 144.4(3) |
| O(5)-Tb(2)-N(4)      | 126.4(2) | N(3)-Tb(2)-N(4)       | 64.0(2)  |

**5**

|             |          |              |          |
|-------------|----------|--------------|----------|
| Dy(1)-O(10) | 2.326(2) | Dy(1)-O(3)#2 | 2.334(2) |
|-------------|----------|--------------|----------|



|                      |            |                     |            |
|----------------------|------------|---------------------|------------|
| Dy(1)-O(12)#2        | 2.344(3)   | Dy(1)-O(1)          | 2.367(3)   |
| Dy(1)-O(13)          | 2.408(2)   | Dy(1)-O(11)         | 2.478(3)   |
| Dy(1)-N(1)           | 2.541(3)   | Dy(1)-N(2)          | 2.568(3)   |
| Dy(2)-O(7)#1         | 2.240(2)   | Dy(2)-O(9)          | 2.268(2)   |
| Dy(2)-O(2)           | 2.365(2)   | Dy(2)-O(6)          | 2.382(2)   |
| Dy(2)-O(14)          | 2.391(3)   | Dy(2)-O(5)          | 2.468(2)   |
| Dy(2)-N(3)           | 2.500(3)   | Dy(2)-N(4)          | 2.565(3)   |
| O(3)#1-Dy(1)-O(10)   | 87.81(8)   | O(10)-Dy(1)-O(12)#2 | 150.37(9)  |
| O(3)#2-Dy(1)-O(12)#2 | 117.51(9)  | O(10)-Dy(1)-O(1)    | 76.98(9)   |
| O(3)#2-Dy(1)-O(1)    | 144.14(8)  | O(12)#2-Dy(1)-O(1)  | 73.43(10)  |
| O(10)-Dy(1)-O(13)    | 135.78(8)  | O(3)#2-Dy(1)-O(13)  | 72.51(8)   |
| O(12)#2-Dy(1)-O(13)  | 70.67(10)  | O(1)-Dy(1)-O(13)    | 138.98(8)  |
| O(10)-Dy(1)-O(11)    | 72.82(8)   | O(3)#2-Dy(1)-O(11)  | 71.24(8)   |
| O(12)#2-Dy(1)-O(11)  | 99.68(10)  | O(1)-Dy(1)-O(11)    | 73.27(9)   |
| O(13)-Dy(1)-O(11)    | 131.75(9)  | O(10)-Dy(1)-N(1)    | 95.12(8)   |
| O(3)#2-Dy(1)-N(1)    | 141.10(9)  | O(12)#2-Dy(1)-N(1)  | 75.13(9)   |
| O(1)-Dy(1)-N(1)      | 73.37(9)   | O(13)-Dy(1)-N(1)    | 78.80(9)   |
| O(11)-Dy(1)-N(1)     | 146.30(9)  | O(10)-Dy(1)-N(2)    | 66.39(8)   |
| O(3)#2-Dy(1)-N(2)    | 82.08(8)   | O(12)#2-Dy(1)-N(2)  | 128.60(10) |
| O(1)-Dy(1)-N(2)      | 119.25(9)  | O(13)-Dy(1)-N(2)    | 71.82(8)   |
| O(11)-Dy(1)-N(2)     | 131.61(8)  | N(1)-Dy(1)-N(2)     | 64.10(9)   |
| O(7)#1-Dy(2)-O(9)    | 146.41(8)  | O(7)#1-Dy(2)-O(2)   | 131.83(9)  |
| O(9)-Dy(2)-O(2)      | 77.00(8)   | O(7)#1-Dy(2)-O(6)   | 82.00(9)   |
| O(9)-Dy(2)-O(6)      | 83.37(9)   | O(2)-Dy(2)-O(6)     | 137.94(9)  |
| O(7)#1-Dy(2)-O(14)   | 71.78(9)   | O(9)-Dy(2)-O(14)    | 141.61(9)  |
| O(2)-Dy(2)-O(14)     | 66.71(9)   | O(6)-Dy(2)-O(14)    | 115.50(12) |
| O(7)#1-Dy(2)-O(5)    | 105.92(10) | O(9)-Dy(2)-O(5)     | 88.61(10)  |
| O(2)-Dy(2)-O(5)      | 89.54(8)   | O(6)-Dy(2)-O(5)     | 52.81(8)   |
| O(14)-Dy(2)-O(5)     | 79.29(12)  | O(7)#1-Dy(2)-N(3)   | 81.08(9)   |
| O(9)-Dy(2)-N(3)      | 90.53(9)   | O(2)-Dy(2)-N(3)     | 78.68(9)   |
| O(6)-Dy(2)-N(3)      | 138.84(8)  | O(14)-Dy(2)-N(3)    | 94.15(12)  |
| O(5)-Dy(2)-N(3)      | 168.07(8)  | O(7)#1-Dy(2)-N(4)   | 78.07(9)   |
| O(9)-Dy(2)-N(4)      | 68.99(8)   | O(2)-Dy(2)-N(4)     | 128.68(9)  |
| O(6)-Dy(2)-N(4)      | 75.11(9)   | O(14)-Dy(2)-N(4)    | 145.67(10) |
| O(5)-Dy(2)-N(4)      | 125.59(9)  | N(3)-Dy(2)-N(4)     | 64.80(9)   |

Symmetry transformations used to generate equivalent atoms: For **1**: #1: -x+1, -y, -z+1; #2: -x+1, -y+1, -z. For **2**: #1: -x, -y+1, -z+1; #2: -x, -y+2, -z. For **3**: #1: -x+1, -y, -z+2; #2: -x+1, -y+1, -z+1. For **4**: #1: -x+1, -y, -z+1; #2: -x+1, -y+1, -z. For **5**: #1: -x, -y+1, -z; #2: -x, -y, -z.

**Table S2** Selected bond lengths (Å) and angles (°) for complexes **6-9**

| <b>6</b>            |            |                     |            |
|---------------------|------------|---------------------|------------|
| La(1)-O(5)          | 2.390(3)   | La(1)-O(3)#1        | 2.518(9)   |
| La(1)-O(7)          | 2.524(9)   | La(1)-O(4)#2        | 2.553(9)   |
| La(1)-O(2)#1        | 2.564(9)   | La(1)-O(1)          | 2.664(8)   |
| La(1)-N(1)          | 2.681(10)  | La(1)-N(2)          | 2.713(10)  |
| La(1)-O(2)          | 2.705(9)   |                     |            |
| O(5)-La(1)-O(3)#1   | 87.4(8)    | O(5)-La(1)-O(7)     | 75.5(8)    |
| O(3)#1-La(1)-O(7)   | 135.1(3)   | O(5)-La(1)-O(4)#2   | 85.6(8)    |
| O(3)#1-La(1)-O(4)#2 | 145.6(3)   | O(7)-La(1)-O(4)#2   | 75.0(3)    |
| O(5)-La(1)-O(2)#1   | 72.0(8)    | O(3)#1-La(1)-O(2)#1 | 70.5(3)    |
| O(7)-La(1)-O(2)#1   | 64.7(3)    | O(4)#2-La(1)-O(2)#1 | 137.4(3)   |
| O(5)-La(1)-O(1)     | 142.9(8)   | O(3)#1-La(1)-O(1)   | 128.7(3)   |
| O(7)-La(1)-O(1)     | 72.1(3)    | O(4)#2-La(1)-O(1)   | 69.2(3)    |
| O(2)#1-La(1)-O(1)   | 108.6(3)   | O(5)-La(1)-N(1)     | 84.1(8)    |
| O(3)#1-La(1)-N(1)   | 74.4(3)    | O(7)-La(1)-N(1)     | 141.7(3)   |
| O(4)#2-La(1)-N(1)   | 71.4(3)    | O(2)#1-La(1)-N(1)   | 137.9(3)   |
| O(1)-La(1)-N(1)     | 111.2(3)   | O(5)-La(1)-O(2)     | 132.9(3)   |
| O(3)#1-La(1)-O(2)   | 95.5(3)    | O(7)-La(1)-O(2)     | 69.6(3)    |
| O(4)#2-La(1)-O(2)   | 113.7(3)   | O(2)#1-La(1)-O(2)   | 65.0(3)    |
| O(1)-La(1)-O(2)     | 47.5(3)    | N(1)-La(1)-O(2)     | 141.9(3)   |
| O(5)-La(1)-N(2)     | 143.5(8)   | O(3)#1-La(1)-N(2)   | 73.2(3)    |
| O(7)-La(1)-N(2)     | 139.3(3)   | O(4)#2-La(1)-N(2)   | 93.3(3)    |
| O(2)#1-La(1)-N(2)   | 126.1(3)   | O(1)-La(1)-N(2)     | 67.3(3)    |
| N(1)-La(1)-N(2)     | 61.3(3)    | N(2)-La(1)-O(2)     | 80.6(3)    |
| <b>7</b>            |            |                     |            |
| Dy(1)-O(13)         | 2.297(3)   | Dy(1)-O(1)          | 2.313(3)   |
| Dy(1)-O(12)         | 2.322(3)   | Dy(1)-O(17)         | 2.415(3)   |
| Dy(1)-O(19)         | 2.419(3)   | Dy(1)-O(18)         | 2.431(3)   |
| Dy(1)-N(6)          | 2.515(4)   | Dy(1)-N(5)          | 2.517(4)   |
| Dy(2)-O(16)#2       | 2.323(3)   | Dy(2)-O(4)          | 2.352(3)   |
| Dy(2)-O(2)          | 2.369(3)   | Dy(2)-O(20)         | 2.371(3)   |
| Dy(2)-O(21)         | 2.420(3)   | Dy(2)-O(10)         | 2.424(3)   |
| Dy(2)-N(3)          | 2.548(4)   | Dy(2)-N(4)          | 2.559(4)   |
| Dy(2)-O(9)          | 2.779(3)   | Dy(3)-O(5)          | 2.266(3)   |
| Dy(3)-O(3)          | 2.322(3)   | Dy(3)-O(7)#1        | 2.338(3)   |
| Dy(3)-O(11)         | 2.367(3)   | Dy(3)-O(9)          | 2.379(3)   |
| Dy(3)-O(8)          | 2.402(3)   | Dy(3)-N(1)          | 2.563(3)   |
| Dy(3)-N(2)          | 2.567(4)   |                     |            |
| O(13)-Dy(1)-O(1)    | 143.65(11) | O(13)-Dy(1)-O(12)   | 140.35(11) |
| O(1)-Dy(1)-O(12)    | 76.00(11)  | O(13)-Dy(1)-O(17)   | 76.82(12)  |

|                     |            |                     |            |
|---------------------|------------|---------------------|------------|
| O(1)-Dy(1)-O(17)    | 123.40(12) | O(12)-Dy(1)-O(17)   | 76.90(11)  |
| O(13)-Dy(1)-O(19)   | 74.66(11)  | O(1)-Dy(1)-O(19)    | 69.51(11)  |
| O(12)-Dy(1)-O(19)   | 144.23(11) | O(17)-Dy(1)-O(19)   | 130.73(12) |
| O(13)-Dy(1)-O(18)   | 80.31(12)  | O(1)-Dy(1)-O(18)    | 88.87(11)  |
| O(12)-Dy(1)-O(18)   | 106.70(12) | O(17)-Dy(1)-O(18)   | 53.79(12)  |
| O(19)-Dy(1)-O(18)   | 82.23(12)  | O(13)-Dy(1)-N(6)    | 72.80(12)  |
| O(1)-Dy(1)-N(6)     | 135.22(12) | O(12)-Dy(1)-N(6)    | 74.04(11)  |
| O(17)-Dy(1)-N(6)    | 80.64(12)  | O(19)-Dy(1)-N(6)    | 126.15(12) |
| O(18)-Dy(1)-N(6)    | 131.37(12) | O(13)-Dy(1)-N(5)    | 99.28(13)  |
| O(1)-Dy(1)-N(5)     | 80.45(12)  | O(12)-Dy(1)-N(5)    | 85.66(12)  |
| O(17)-Dy(1)-N(5)    | 144.57(12) | O(19)-Dy(1)-N(5)    | 79.69(12)  |
| O(18)-Dy(1)-N(5)    | 161.32(12) | N(6)-Dy(1)-N(5)     | 64.88(12)  |
| O(16)#2-Dy(2)-O(4)  | 76.36(10)  | O(16)#2-Dy(2)-O(2)  | 75.39(11)  |
| O(4)-Dy(2)-O(2)     | 75.27(10)  | O(16)#2-Dy(2)-O(20) | 134.14(11) |
| O(4)-Dy(2)-O(20)    | 77.03(11)  | O(2)-Dy(2)-O(20)    | 131.26(11) |
| O(16)#2-Dy(2)-O(21) | 75.37(10)  | O(4)-Dy(2)-O(21)    | 144.15(10) |
| O(2)-Dy(2)-O(21)    | 76.62(10)  | O(20)-Dy(2)-O(21)   | 138.81(11) |
| O(16)#2-Dy(2)-O(10) | 141.21(11) | O(4)-Dy(2)-O(10)    | 120.89(10) |
| O(2)-Dy(2)-O(10)    | 76.46(10)  | O(20)-Dy(2)-O(10)   | 84.65(11)  |
| O(21)-Dy(2)-O(10)   | 72.54(10)  | O(16)#2-Dy(2)-N(3)  | 68.87(12)  |
| O(4)-Dy(2)-N(3)     | 85.05(13)  | O(2)-Dy(2)-N(3)     | 142.36(12) |
| O(20)-Dy(2)-N(3)    | 72.22(12)  | O(21)-Dy(2)-N(3)    | 104.61(13) |
| O(10)-Dy(2)-N(3)    | 140.60(12) | O(16)#2-Dy(2)-N(4)  | 110.41(13) |
| O(4)-Dy(2)-N(4)     | 142.01(13) | O(2)-Dy(2)-N(4)     | 142.58(13) |
| O(20)-Dy(2)-N(4)    | 72.23(12)  | O(21)-Dy(2)-N(4)    | 69.81(12)  |
| N(3)-Dy(2)-N(4)     | 64.80(16)  | O(10)-Dy(2)-N(4)    | 78.10(13)  |
| O(16)#2-Dy(2)-O(9)  | 134.83(10) | O(4)-Dy(2)-O(9)     | 71.80(9)   |
| O(2)-Dy(2)-O(9)     | 66.17(9)   | O(20)-Dy(2)-O(9)    | 67.43(9)   |
| O(21)-Dy(2)-O(9)    | 115.58(10) | O(10)-Dy(2)-O(9)    | 49.36(9)   |
| N(3)-Dy(2)-O(9)     | 136.85(12) | N(4)-Dy(2)-O(9)     | 114.46(12) |
| O(5)-Dy(3)-O(7)#1   | 88.20(11)  | O(3)-Dy(3)-O(7)#1   | 149.72(10) |
| O(5)-Dy(3)-O(11)    | 141.81(11) | O(3)-Dy(3)-O(11)    | 79.43(11)  |
| O(7)#1-Dy(3)-O(11)  | 110.49(10) | O(5)-Dy(3)-O(9)     | 146.23(11) |
| O(3)-Dy(3)-O(9)     | 79.60(10)  | O(7)#1-Dy(3)-O(9)   | 76.87(10)  |
| O(11)-Dy(3)-O(9)    | 71.90(10)  | O(5)-Dy(3)-O(8)     | 73.92(10)  |
| O(3)-Dy(3)-O(8)     | 78.87(10)  | O(7)#1-Dy(3)-O(8)   | 76.27(10)  |
| O(11)-Dy(3)-O(8)    | 141.52(10) | O(9)-Dy(3)-O(8)     | 73.18(10)  |
| O(5)-Dy(3)-N(1)     | 71.17(11)  | O(3)-Dy(3)-N(1)     | 75.71(10)  |
| O(7)#1-Dy(3)-N(1)   | 134.30(11) | O(11)-Dy(3)-N(1)    | 72.13(11)  |
| O(9)-Dy(3)-N(1)     | 139.31(11) | O(8)-Dy(3)-N(1)     | 131.15(11) |
| O(5)-Dy(3)-N(2)     | 84.05(11)  | O(3)-Dy(3)-N(2)     | 135.57(11) |
| O(7)#1-Dy(3)-N(2)   | 73.55(10)  | O(11)-Dy(3)-N(2)    | 70.78(11)  |
| O(9)-Dy(3)-N(2)     | 119.16(10) | O(8)-Dy(3)-N(2)     | 142.93(10) |
| N(1)-Dy(3)-N(2)     | 64.32(11)  | O(5)-Dy(3)-O(3)     | 101.31(11) |

---

|                     |            |                     |            |
|---------------------|------------|---------------------|------------|
| Tb(1)-O(13)         | 2.305(3)   | Tb(1)-O(1)          | 2.325(3)   |
| Tb(1)-O(12)         | 2.329(3)   | Tb(1)-O(19)         | 2.415(3)   |
| Tb(1)-O(17)         | 2.430(3)   | Tb(1)-O(18)         | 2.434(3)   |
| Tb(1)-N(6)          | 2.512(3)   | Tb(1)-N(5)          | 2.528(3)   |
| Tb(2)-O(16)#1       | 2.331(2)   | Tb(2)-O(3)          | 2.366(3)   |
| Tb(2)-O(2)          | 2.376(2)   | Tb(2)-O(20)         | 2.384(3)   |
| Tb(2)-O(21)         | 2.423(3)   | Tb(2)-O(10)         | 2.440(3)   |
| Tb(2)-N(3)          | 2.546(3)   | Tb(2)-N(4)          | 2.569(3)   |
| Tb(2)-O(9)          | 2.716(3)   | Tb(3)-O(5)          | 2.276(3)   |
| Tb(3)-O(4)          | 2.332(2)   | Tb(3)-O(7)#2        | 2.349(2)   |
| Tb(3)-O(11)         | 2.368(3)   | Tb(3)-O(9)          | 2.398(3)   |
| Tb(3)-O(8)          | 2.407(3)   | Tb(3)-N(2)          | 2.565(3)   |
| Tb(3)-N(1)          | 2.573(3)   |                     |            |
| O(13)-Tb(1)-O(1)    | 144.33(9)  | O(13)-Tb(1)-O(12)   | 138.88(9)  |
| O(1)-Tb(1)-O(12)    | 76.79(9)   | O(13)-Tb(1)-O(19)   | 75.41(9)   |
| O(1)-Tb(1)-O(19)    | 69.56(9)   | O(12)-Tb(1)-O(19)   | 144.80(9)  |
| O(13)-Tb(1)-O(17)   | 75.56(9)   | O(1)-Tb(1)-O(17)    | 123.92(9)  |
| O(12)-Tb(1)-O(17)   | 77.03(9)   | O(19)-Tb(1)-O(17)   | 130.94(9)  |
| O(13)-Tb(1)-O(18)   | 78.61(10)  | O(1)-Tb(1)-O(18)    | 89.91(9)   |
| O(12)-Tb(1)-O(18)   | 108.49(9)  | O(19)-Tb(1)-O(18)   | 81.95(9)   |
| O(17)-Tb(1)-O(18)   | 54.04(9)   | O(13)-Tb(1)-N(6)    | 72.76(10)  |
| O(1)-Tb(1)-N(6)     | 134.60(10) | O(12)-Tb(1)-N(6)    | 73.21(10)  |
| O(19)-Tb(1)-N(6)    | 125.33(9)  | O(17)-Tb(1)-N(6)    | 81.15(10)  |
| O(18)-Tb(1)-N(6)    | 131.61(10) | O(13)-Tb(1)-N(5)    | 101.60(10) |
| O(1)-Tb(1)-N(5)     | 78.75(10)  | O(12)-Tb(1)-N(5)    | 84.22(10)  |
| O(19)-Tb(1)-N(5)    | 79.52(10)  | O(17)-Tb(1)-N(5)    | 145.02(10) |
| O(18)-Tb(1)-N(5)    | 160.74(10) | N(6)-Tb(1)-N(5)     | 65.15(10)  |
| O(16)#1-Tb(2)-O(3)  | 75.08(9)   | O(16)#1-Tb(2)-O(2)  | 74.72(9)   |
| O(3)-Tb(2)-O(2)     | 75.45(9)   | O(16)#1-Tb(2)-O(20) | 134.13(9)  |
| O(3)-Tb(2)-O(20)    | 78.20(9)   | O(2)-Tb(2)-O(20)    | 132.34(9)  |
| O(16)#1-Tb(2)-O(21) | 75.58(9)   | O(3)-Tb(2)-O(21)    | 144.17(9)  |
| O(2)-Tb(2)-O(21)    | 77.34(9)   | O(20)-Tb(2)-O(21)   | 137.62(9)  |
| O(16)#1-Tb(2)-O(10) | 141.34(9)  | O(3)-Tb(2)-O(10)    | 122.82(8)  |
| O(2)-Tb(2)-O(10)    | 77.60(8)   | O(20)-Tb(2)-O(10)   | 84.52(9)   |
| O(21)-Tb(2)-O(10)   | 72.40(9)   | O(16)#1-Tb(2)-N(3)  | 68.85(10)  |
| O(3)-Tb(2)-N(3)     | 85.29(10)  | O(2)-Tb(2)-N(3)     | 142.09(10) |
| O(20)-Tb(2)-N(3)    | 72.43(10)  | O(21)-Tb(2)-N(3)    | 102.77(10) |
| O(10)-Tb(2)-N(3)    | 139.34(10) | O(16)#1-Tb(2)-N(4)  | 110.86(10) |
| O(3)-Tb(2)-N(4)     | 141.75(10) | O(2)-Tb(2)-N(4)     | 142.75(10) |
| O(20)-Tb(2)-N(4)    | 71.31(10)  | O(21)-Tb(2)-N(4)    | 69.18(10)  |
| O(10)-Tb(2)-N(4)    | 77.12(10)  | N(3)-Tb(2)-N(4)     | 64.06(12)  |
| O(16)#1-Tb(2)-O(9)  | 134.19(9)  | O(3)-Tb(2)-O(9)     | 72.59(8)   |

|                   |           |                    |           |
|-------------------|-----------|--------------------|-----------|
| O(2)-Tb(2)-O(9)   | 66.38(8)  | O(20)-Tb(2)-O(9)   | 68.15(8)  |
| O(21)-Tb(2)-O(9)  | 116.34(8) | O(10)-Tb(2)-O(9)   | 50.45(8)  |
| N(3)-Tb(2)-O(9)   | 137.77(9) | N(4)-Tb(2)-O(9)    | 114.67(9) |
| O(5)-Tb(3)-O(4)   | 101.75(9) | O(5)-Tb(3)-O(7)#2  | 87.80(9)  |
| O(4)-Tb(3)-O(7)#2 | 150.15(9) | O(5)-Tb(3)-O(11)   | 141.60(9) |
| O(4)-Tb(3)-O(11)  | 79.14(9)  | O(7)#2-Tb(3)-O(11) | 110.62(9) |
| O(5)-Tb(3)-O(9)   | 146.27(9) | O(4)-Tb(3)-O(9)    | 79.43(9)  |
| O(7)#2-Tb(3)-O(9) | 77.27(9)  | O(11)-Tb(3)-O(9)   | 72.07(9)  |
| O(5)-Tb(3)-O(8)   | 74.17(9)  | O(4)-Tb(3)-O(8)    | 79.82(9)  |
| O(7)#2-Tb(3)-O(8) | 75.68(8)  | O(11)-Tb(3)-O(8)   | 141.75(9) |
| O(9)-Tb(3)-O(8)   | 72.90(9)  | O(5)-Tb(3)-N(2)    | 71.47(10) |
| O(4)-Tb(3)-N(2)   | 75.18(9)  | O(7)#2-Tb(3)-N(2)  | 134.42(9) |
| O(11)-Tb(3)-N(2)  | 71.77(9)  | O(9)-Tb(3)-N(2)    | 138.90(9) |
| O(8)-Tb(3)-N(2)   | 131.72(9) | O(5)-Tb(3)-N(1)    | 83.76(9)  |
| O(4)-Tb(3)-N(1)   | 135.36(9) | O(7)#2-Tb(3)-N(1)  | 73.29(9)  |
| O(11)-Tb(3)-N(1)  | 70.76(9)  | O(9)-Tb(3)-N(1)    | 119.34(9) |
| O(8)-Tb(3)-N(1)   | 142.34(9) | N(2)-Tb(3)-N(1)    | 64.63(10) |

**9**

|                   |          |                   |          |
|-------------------|----------|-------------------|----------|
| Yb(1)-O(13)       | 2.251(6) | Yb(1)-O(1)        | 2.270(6) |
| Yb(1)-O(12)       | 2.289(6) | Yb(1)-O(19)       | 2.355(6) |
| Yb(1)-O(17)       | 2.360(6) | Yb(1)-O(18)       | 2.391(6) |
| Yb(1)-N(6)        | 2.470(8) | Yb(1)-N(5)        | 2.479(7) |
| Yb(2)-O(16)#1     | 2.292(6) | Yb(2)-O(3)        | 2.302(6) |
| Yb(2)-O(20)       | 2.323(5) | Yb(2)-O(2)        | 2.338(6) |
| Yb(2)-O(10)       | 2.370(6) | Yb(2)-O(21)       | 2.382(6) |
| Yb(2)-N(3)        | 2.498(5) | Yb(2)-N(4)        | 2.516(5) |
| Yb(2)-O(9)        | 2.846(6) | Yb(3)-O(5)        | 2.225(6) |
| Yb(3)-O(4)        | 2.293(6) | Yb(3)-O(7)#2      | 2.294(6) |
| Yb(3)-O(9)        | 2.304(6) | Yb(3)-O(11)       | 2.352(5) |
| Yb(3)-O(8)        | 2.375(6) | Yb(3)-N(1)        | 2.512(7) |
| Yb(3)-N(2)        | 2.525(6) |                   |          |
| O(13)-Yb(1)-O(1)  | 143.4(3) | O(13)-Yb(1)-O(12) | 141.0(2) |
| O(1)-Yb(1)-O(12)  | 75.6(2)  | O(13)-Yb(1)-O(19) | 74.4(2)  |
| O(1)-Yb(1)-O(19)  | 69.7(2)  | O(12)-Yb(1)-O(19) | 143.8(2) |
| O(13)-Yb(1)-O(17) | 76.8(2)  | O(1)-Yb(1)-O(17)  | 122.2(2) |
| O(12)-Yb(1)-O(17) | 77.6(2)  | O(19)-Yb(1)-O(17) | 130.3(2) |
| O(13)-Yb(1)-O(18) | 80.0(2)  | O(1)-Yb(1)-O(18)  | 87.1(2)  |
| O(12)-Yb(1)-O(18) | 107.8(2) | O(19)-Yb(1)-O(18) | 80.9(2)  |
| O(17)-Yb(1)-O(18) | 54.7(3)  | O(13)-Yb(1)-N(6)  | 72.7(2)  |
| O(1)-Yb(1)-N(6)   | 136.8(2) | O(12)-Yb(1)-N(6)  | 74.2(2)  |
| O(19)-Yb(1)-N(6)  | 126.8(2) | O(17)-Yb(1)-N(6)  | 80.0(2)  |
| O(18)-Yb(1)-N(6)  | 131.4(2) | O(13)-Yb(1)-N(5)  | 99.9(2)  |
| O(1)-Yb(1)-N(5)   | 81.1(2)  | O(12)-Yb(1)-N(5)  | 85.1(2)  |

|                     |            |                     |           |
|---------------------|------------|---------------------|-----------|
| O(19)-Yb(1)-N(5)    | 79.7(2)    | O(17)-Yb(1)-N(5)    | 145.2(3)  |
| O(18)-Yb(1)-N(5)    | 159.8(3)   | N(6)-Yb(1)-N(5)     | 66.3(3)   |
| O(16)#1-Yb(2)-O(3)  | 77.3(2)    | O(16)#1-Yb(2)-O(20) | 135.1(2)  |
| O(3)-Yb(2)-O(20)    | 76.0(2)    | O(16)#1-Yb(2)-O(2)  | 76.2(2)   |
| O(3)-Yb(2)-O(2)     | 75.94(19)  | O(20)-Yb(2)-O(2)    | 129.6(2)  |
| O(16)#1-Yb(2)-O(10) | 141.9(2)   | O(3)-Yb(2)-O(10)    | 118.9(2)  |
| O(20)-Yb(2)-O(10)   | 82.9(2)    | O(2)-Yb(2)-O(10)    | 75.4(2)   |
| O(16)#1-Yb(2)-O(21) | 75.7(2)    | O(3)-Yb(2)-O(21)    | 145.3(2)  |
| O(20)-Yb(2)-O(21)   | 138.7(2)   | O(2)-Yb(2)-O(21)    | 76.6(2)   |
| O(10)-Yb(2)-O(21)   | 73.5(2)    | O(16)#1-Yb(2)-N(3)  | 69.9(2)   |
| O(3)-Yb(2)-N(3)     | 85.0(2)    | O(20)-Yb(2)-N(3)    | 72.4(2)   |
| O(2)-Yb(2)-N(3)     | 143.9(2)   | O(10)-Yb(2)-N(3)    | 140.4(2)  |
| O(21)-Yb(2)-N(3)    | 105.6(2)   | O(16)#1-Yb(2)-N(4)  | 111.2(2)  |
| O(3)-Yb(2)-N(4)     | 141.3(2)   | O(20)-Yb(2)-N(4)    | 72.2(2)   |
| O(2)-Yb(2)-N(4)     | 142.4(2)   | O(10)-Yb(2)-N(4)    | 78.5(2)   |
| O(21)-Yb(2)-N(4)    | 70.2(2)    | N(3)-Yb(2)-N(4)     | 64.9(2)   |
| O(16)#1-Yb(2)-O(9)  | 133.92(19) | O(3)-Yb(2)-O(9)     | 69.99(19) |
| O(20)-Yb(2)-O(9)    | 66.24(19)  | O(2)-Yb(2)-O(9)     | 65.16(19) |
| O(10)-Yb(2)-O(9)    | 49.02(17)  | O(21)-Yb(2)-O(9)    | 116.0(2)  |
| N(3)-Yb(2)-O(9)     | 135.52(19) | N(4)-Yb(2)-O(9)     | 114.7(2)  |
| O(5)-Yb(3)-O(4)     | 102.0(2)   | O(5)-Yb(3)-O(7)#2   | 87.0(2)   |
| O(4)-Yb(3)-O(7)#2   | 149.3(2)   | O(5)-Yb(3)-O(9)     | 146.1(2)  |
| O(4)-Yb(3)-O(9)     | 79.4(2)    | O(7)#2-Yb(3)-O(9)   | 77.2(2)   |
| O(5)-Yb(3)-O(11)    | 141.6(2)   | O(4)-Yb(3)-O(11)    | 79.1(2)   |
| O(7)#2-Yb(3)-O(11)  | 111.7(2)   | O(9)-Yb(3)-O(11)    | 72.2(2)   |
| O(5)-Yb(3)-O(8)     | 74.6(2)    | O(4)-Yb(3)-O(8)     | 78.5(2)   |
| O(7)#2-Yb(3)-O(8)   | 75.7(2)    | O(9)-Yb(3)-O(8)     | 72.5(2)   |
| O(11)-Yb(3)-O(8)    | 141.0(2)   | O(5)-Yb(3)-N(1)     | 84.4(2)   |
| O(4)-Yb(3)-N(1)     | 136.2(2)   | O(7)#2-Yb(3)-N(1)   | 73.4(2)   |
| O(9)-Yb(3)-N(1)     | 118.3(2)   | O(11)-Yb(3)-N(1)    | 70.6(2)   |
| O(8)-Yb(3)-N(1)     | 143.2(2)   | O(5)-Yb(3)-N(2)     | 71.0(2)   |
| O(4)-Yb(3)-N(2)     | 75.1(2)    | O(7)#2-Yb(3)-N(2)   | 135.1(2)  |
| O(9)-Yb(3)-N(2)     | 139.4(2)   | O(11)-Yb(3)-N(2)    | 72.3(2)   |
| O(8)-Yb(3)-N(2)     | 130.5(2)   | N(1)-Yb(3)-N(2)     | 66.1(2)   |

Symmetry transformations used to generate equivalent atoms: For **6**: #1: -x+1, -y, -z; #2: -x+1, -y+1, -z+1. For **7**: #1: -x+2, -y+1, -z+1; #2: -x+1, -y, -z. For **8**: #1: -x, -y, -z. #2: -x+1, -y+1, -z+1; For **9**: #1: -x, -y+1, -z; #2 -x+1, -y+2, -z+1.

**Table S3** Selected bond lengths (Å) and angles (°) for complexes **10-11**

| <b>10</b>    |          |               |          |
|--------------|----------|---------------|----------|
| Eu(1)-O(2)#1 | 2.338(6) | Eu(1)-O(10)#1 | 2.343(6) |
| Eu(1)-O(8)   | 2.345(8) | Eu(1)-O(12)   | 2.373(6) |
| Eu(1)-O(4)   | 2.396(7) | Eu(1)-O(6)    | 2.418(6) |

|             |          |            |           |
|-------------|----------|------------|-----------|
| Eu(1)-N(1)  | 2.588(9) | Eu(1)-N(2) | 2.611(10) |
| Eu(2)-O(9)  | 2.338(6) | Eu(2)-O(1) | 2.348(6)  |
| Eu(2)-O(5)  | 2.368(6) | Eu(2)-O(3) | 2.375(8)  |
| Eu(2)-O(11) | 2.395(7) | Eu(2)-O(7) | 2.409(7)  |
| Eu(2)-N(3)  | 2.594(9) | Eu(2)-N(4) | 2.601(9)  |

|                      |          |                    |          |
|----------------------|----------|--------------------|----------|
| O(2)#1-Eu(1)-O(10)#1 | 78.1(2)  | O(2)#1-Eu(1)-O(8)  | 79.7(2)  |
| O(10)#1-Eu(1)-O(8)   | 82.1(3)  | O(2)#1-Eu(1)-O(12) | 148.4(3) |
| O(10)#1-Eu(1)-O(12)  | 80.7(2)  | O(8)-Eu(1)-O(12)   | 74.4(3)  |
| O(2)#1-Eu(1)-O(4)    | 135.8(2) | O(10)#1-Eu(1)-O(4) | 139.5(2) |
| O(8)-Eu(1)-O(4)      | 119.6(3) | O(12)-Eu(1)-O(4)   | 74.2(2)  |
| O(2)#1-Eu(1)-O(6)    | 73.5(2)  | O(10)#1-Eu(1)-O(6) | 149.2(2) |
| O(8)-Eu(1)-O(6)      | 81.3(2)  | O(12)-Eu(1)-O(6)   | 119.1(2) |
| O(4)-Eu(1)-O(6)      | 71.2(2)  | O(2)#1-Eu(1)-N(1)  | 75.0(3)  |
| O(10)#1-Eu(1)-N(1)   | 106.0(2) | O(8)-Eu(1)-N(1)    | 150.9(3) |
| O(12)-Eu(1)-N(1)     | 133.9(3) | O(4)-Eu(1)-N(1)    | 72.3(2)  |
| O(6)-Eu(1)-N(1)      | 78.0(3)  | O(2)#1-Eu(1)-N(2)  | 117.5(2) |
| O(10)#1-Eu(1)-N(2)   | 72.8(3)  | O(8)-Eu(1)-N(2)    | 144.8(3) |
| O(12)-Eu(1)-N(2)     | 77.4(3)  | O(4)-Eu(1)-N(2)    | 71.0(3)  |
| O(6)-Eu(1)-N(2)      | 131.6(3) | N(1)-Eu(1)-N(2)    | 62.4(3)  |
| O(9)-Eu(2)-O(1)      | 76.4(2)  | O(9)-Eu(2)-O(5)    | 144.1(3) |
| O(1)-Eu(2)-O(5)      | 74.6(2)  | O(9)-Eu(2)-O(3)    | 80.8(3)  |
| O(1)-Eu(2)-O(3)      | 82.9(3)  | O(5)-Eu(2)-O(3)    | 75.2(3)  |
| O(9)-Eu(2)-O(11)     | 78.3(2)  | O(1)-Eu(2)-O(11)   | 149.2(3) |
| O(5)-Eu(2)-O(11)     | 119.9(2) | O(3)-Eu(2)-O(11)   | 76.0(3)  |
| O(9)-Eu(2)-O(7)      | 138.4(2) | O(1)-Eu(2)-O(7)    | 138.0(2) |
| O(5)-Eu(2)-O(7)      | 77.3(2)  | O(3)-Eu(2)-O(7)    | 118.9(2) |
| O(11)-Eu(2)-O(7)     | 72.7(2)  | O(9)-Eu(2)-N(3)    | 114.2(2) |
| O(1)-Eu(2)-N(3)      | 76.1(3)  | O(5)-Eu(2)-N(3)    | 78.5(3)  |
| O(3)-Eu(2)-N(3)      | 149.9(3) | O(11)-Eu(2)-N(3)   | 131.1(3) |
| O(7)-Eu(2)-N(3)      | 68.1(2)  | O(9)-Eu(2)-N(4)    | 74.1(3)  |
| O(1)-Eu(2)-N(4)      | 110.4(2) | O(5)-Eu(2)-N(4)    | 136.4(3) |
| O(3)-Eu(2)-N(4)      | 147.3(3) | O(11)-Eu(2)-N(4)   | 78.7(3)  |
| O(7)-Eu(2)-N(4)      | 71.5(3)  | N(3)-Eu(2)-N(4)    | 62.1(3)  |

---

**11**

---

|              |          |               |          |
|--------------|----------|---------------|----------|
| Tb(1)-O(2)#1 | 2.320(6) | Tb(1)-O(10)#1 | 2.322(5) |
| Tb(1)-O(8)   | 2.328(6) | Tb(1)-O(12)   | 2.345(6) |
| Tb(1)-O(4)   | 2.374(6) | Tb(1)-O(6)    | 2.395(6) |
| Tb(1)-N(2)   | 2.560(7) | Tb(1)-N(1)    | 2.586(7) |
| Tb(2)-O(9)   | 2.303(6) | Tb(2)-O(1)    | 2.331(5) |
| Tb(2)-O(5)   | 2.345(6) | Tb(2)-O(3)    | 2.352(6) |
| Tb(2)-O(11)  | 2.356(6) | Tb(2)-O(7)    | 2.386(5) |
| Tb(2)-N(3)   | 2.572(7) | Tb(2)-N(4)    | 2.573(8) |

|                      |           |                     |          |
|----------------------|-----------|---------------------|----------|
| O(2)#1-Tb(1)-O(10)#1 | 77.9(2)   | O(2)#1-Tb(1)-O(8)   | 78.9(2)  |
| O(10)#1-Tb(1)-O(8)   | 82.0(2)   | O(2)#1-Tb(1)-O(12)  | 148.2(2) |
| O(10)#1-Tb(1)-O(12)  | 80.8(2)   | O(8)-Tb(1)-O(12)    | 74.9(2)  |
| O(2)#1-Tb(1)-O(4)    | 136.3(2)  | O(10)#1-Tb(1)-O(12) | 139.5(2) |
| O(8)-Tb(1)-O(4)      | 119.6(2)  | O(12)-Tb(1)-O(4)    | 73.7(2)  |
| O(2)#1-Tb(1)-O(6)    | 73.69(19) | O(10)#1-Tb(1)-O(6)  | 149.2(2) |
| O(8)-Tb(1)-O(6)      | 81.2(2)   | O(12)-Tb(1)-O(6)    | 119.0(2) |
| O(4)-Tb(1)-O(6)      | 71.2(2)   | O(2)#1-Tb(1)-N(2)   | 74.8(2)  |
| O(10)#1-Tb(1)-N(2)   | 106.1(2)  | O(8)-Tb(1)-N(2)     | 150.0(2) |
| O(12)-Tb(1)-N(2)     | 134.4(2)  | O(4)-Tb(1)-N(2)     | 73.0(2)  |
| O(6)-Tb(1)-N(2)      | 77.7(2)   | O(2)#1-Tb(1)-N(1)   | 117.6(2) |
| O(10)#1-Tb(1)-N(1)   | 72.4(2)   | O(8)-Tb(1)-N(1)     | 144.6(2) |
| O(12)-Tb(1)-N(1)     | 77.2(2)   | O(4)-Tb(1)-N(1)     | 71.6(2)  |
| O(6)-Tb(1)-N(1)      | 132.1(2)  | N(2)-Tb(1)-N(1)     | 63.3(3)  |
| O(9)-Tb(2)-O(1)      | 76.3(2)   | O(9)-Tb(2)-O(5)     | 143.6(2) |
| O(1)-Tb(2)-O(5)      | 74.01(19) | O(9)-Tb(2)-O(3)     | 80.4(2)  |
| O(1)-Tb(2)-O(3)      | 82.9(2)   | O(5)-Tb(2)-O(3)     | 75.5(2)  |
| O(9)-Tb(2)-O(11)     | 78.5(2)   | O(1)-Tb(2)-O(11)    | 149.1(2) |
| O(5)-Tb(2)-O(11)     | 120.1(2)  | O(3)-Tb(2)-O(11)    | 75.5(2)  |
| O(9)-Tb(2)-O(7)      | 139.2(2)  | O(1)-Tb(2)-O(7)     | 137.5(2) |
| O(5)-Tb(2)-O(7)      | 77.1(2)   | O(3)-Tb(2)-O(7)     | 119.0(2) |
| O(11)-Tb(2)-O(7)     | 73.2(2)   | O(9)-Tb(2)-N(3)     | 73.8(2)  |
| O(1)-Tb(2)-N(3)      | 111.1(2)  | O(5)-Tb(2)-N(3)     | 137.2(2) |
| O(3)-Tb(2)-N(3)      | 146.1(2)  | O(11)-Tb(2)-N(3)    | 78.2(2)  |
| O(7)-Tb(2)-N(3)      | 72.0(2)   | O(9)-Tb(2)-N(4)     | 77.9(2)  |
| O(1)-Tb(2)-N(4)      | 75.7(2)   | O(5)-Tb(2)-N(4)     | 149.5(2) |
| O(3)-Tb(2)-N(4)      | 149.5(2)  | O(11)-Tb(2)-N(4)    | 131.9(2) |
| O(7)-Tb(2)-N(4)      | 68.2(2)   | N(3)-Tb(2)-N(4)     | 63.6(2)  |

Symmetry transformations used to generate equivalent atoms: For **10**: #1: x, -y+1/2, z+1/2; #2: x, -y+1/2, z-1/2. For **11**: #1: x, -y+3/2, z+1/2; #2 x, -y+3/2, z-1/2.

Table S4 CIE chromaticity coordinates for the Dy<sub>0.986</sub>Eu<sub>0.014</sub> doped complex excited at 320 to 360nm

| Dy <sub>0.986</sub> Eu <sub>0.014</sub>             |                                     |
|-----------------------------------------------------|-------------------------------------|
| Excitation wavelength ( $\lambda_{\text{ex}}$ / nm) | CIE chromaticity coordinates (x, y) |
| 320                                                 | (0.341, 0.351)A                     |
| 330                                                 | (0.355, 0.352)                      |
| 340                                                 | (0.358, 0.351)                      |
| 350                                                 | (0.355, 0.345)                      |
| 352                                                 | <b>(0.349, 0.338)B</b>              |
| 360                                                 | (0.295, 0.279)C                     |



Table S5 CIE chromaticity coordinates for the Dy<sub>0.973</sub>Gd<sub>0.018</sub>Eu<sub>0.009</sub> doped complex excited at 320 to 360nm

| Dy <sub>0.973</sub> Gd <sub>0.018</sub> Eu <sub>0.009</sub> |                                     |
|-------------------------------------------------------------|-------------------------------------|
| Excitation wavelength ( $\lambda_{\text{ex}}$ / nm)         | CIE chromaticity coordinates (x, y) |
| 320                                                         | (0.321, 0.34)A                      |
| 330                                                         | (0.332, 0.34)                       |
| 340                                                         | (0.332, 0.336)                      |
| 345                                                         | <b>(0.331, 0.332) B</b>             |
| 350                                                         | (0.324, 0.321)                      |
| 360                                                         | (0.271, 0.262)C                     |
